# Supplementary material
Source: PubMed Central journal article supplement (PMC4301992)
Supplement: NIHMS647850-supplement.pdf [file NIHMS647850-supplement.pdf]

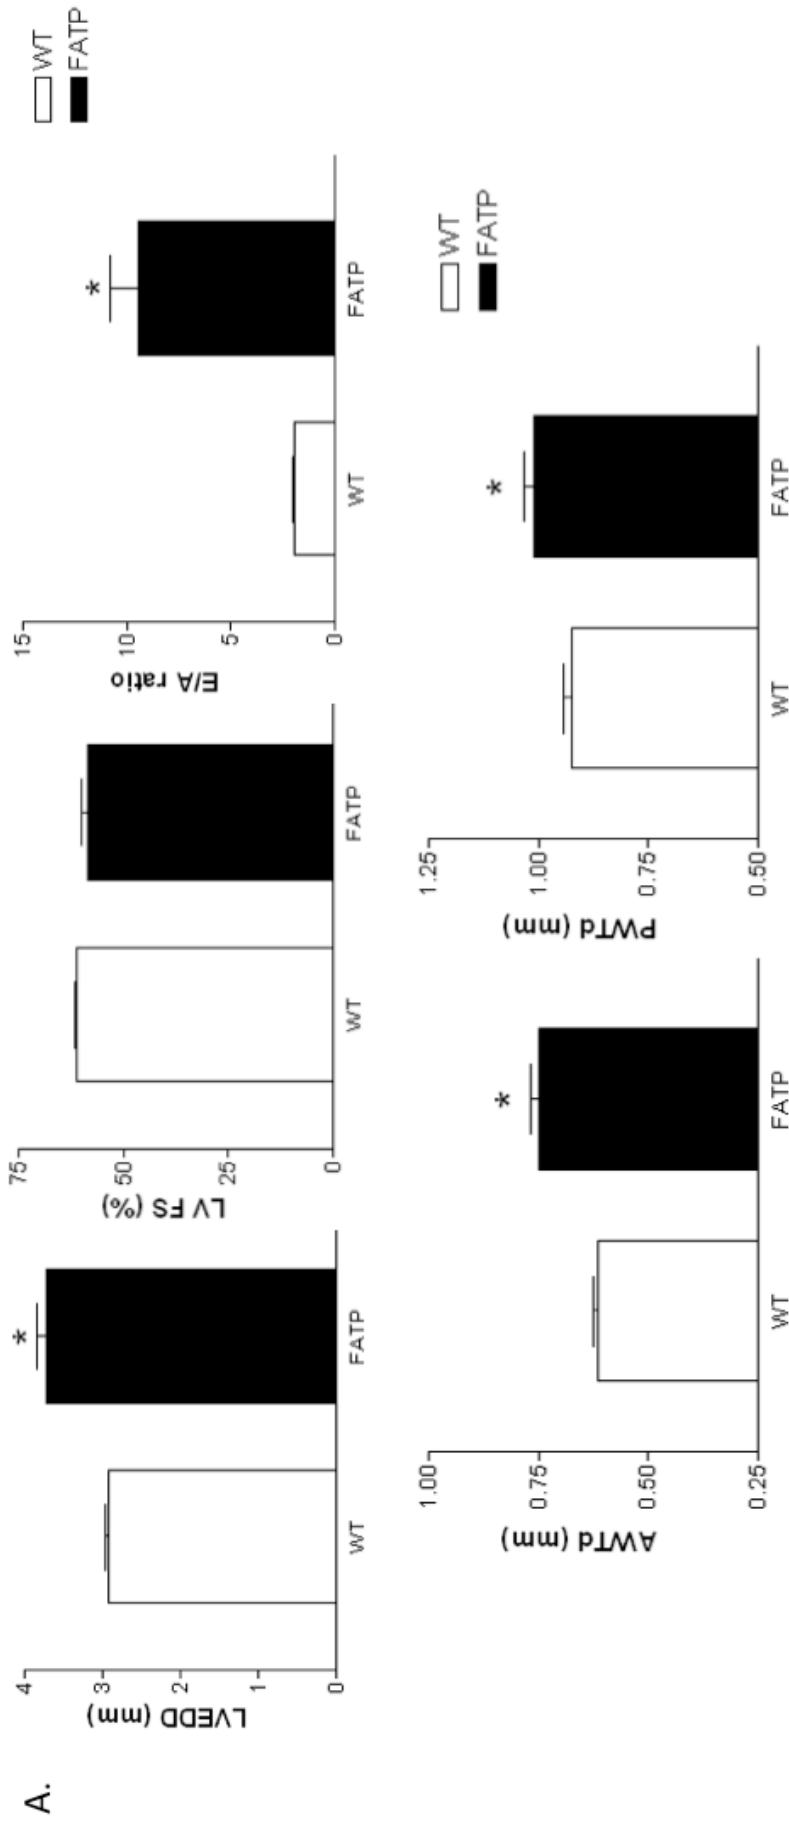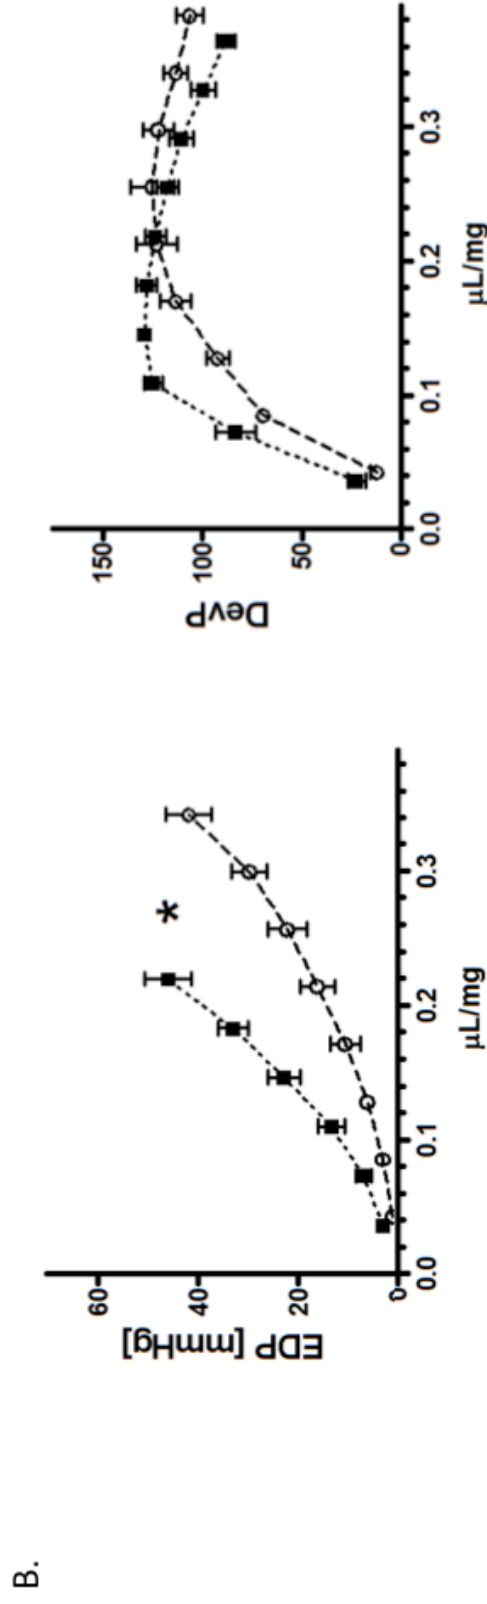

**Supplemental Figure 1:** FATP1 mice have cardiac hypertrophy and diastolic dysfunction. **A.** FATP1 hearts have increased left-ventricular end diastolic diameter (LVEDD), increased early/late diastolic filling ratio (E/A), increased anterior and posterior wall thickness (AWTd and PWTd) with preserved fractional shortening (FS) by echocardiography. **B.** Pressure-volume curves by Langendorff method showing an upward and leftward shift of the curves in FATP hearts indicating decreased LV compliance for a given LV volume normalized by heart weight with preserved LV developed pressures.

### Plasma Ceramide

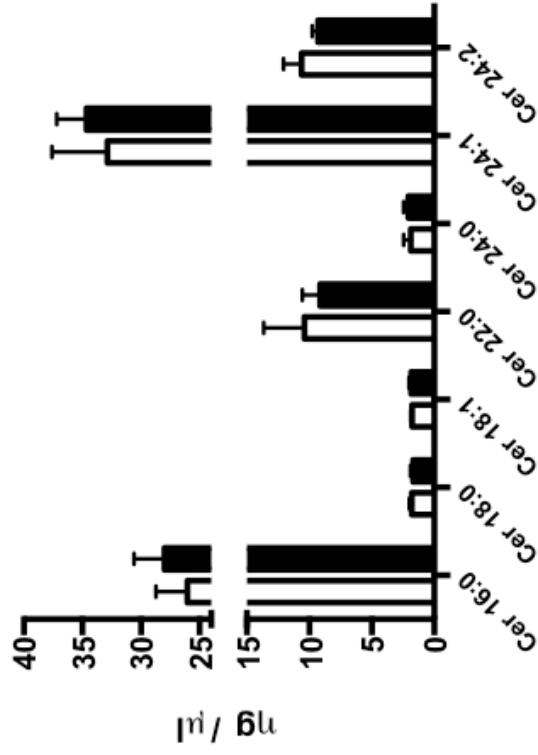

### Plasma Sphingomyelin

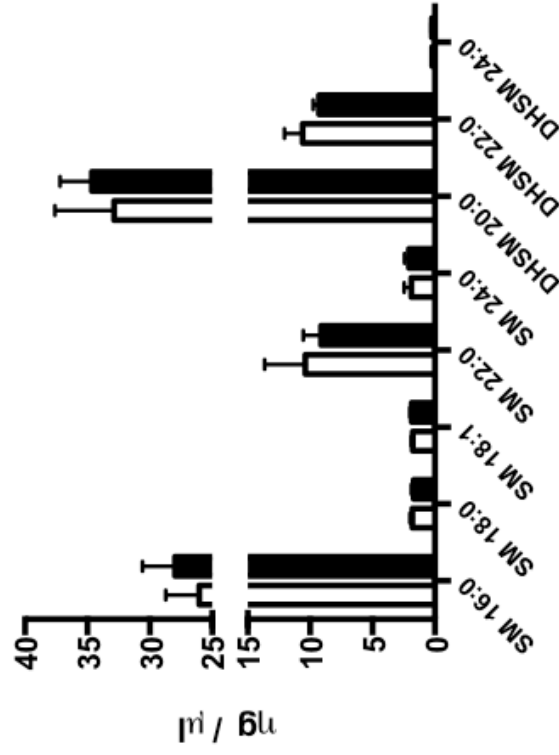

□ WT  
■ FATP1

### Lipid Metabolism Gene Expression

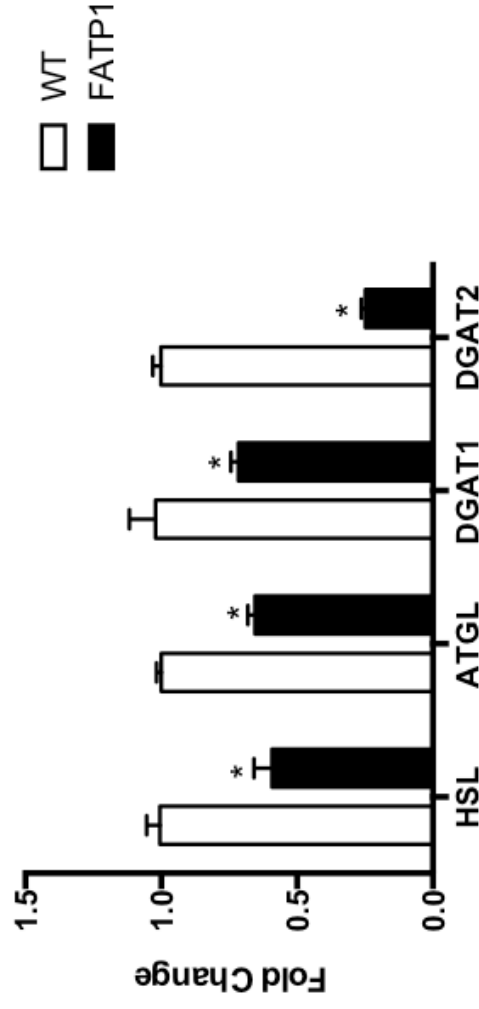

□ WT  
■ FATP1

**Supplemental Figure 2:** FATP1 mice have unchanged plasma concentrations of ceramide and sphingomyelin, and decreased cardiac expression of genes regulating TAG synthesis (DGAT1, DGAT2), and DG metabolism (ATGL, HSL) (n = 5-6, error bars are mean ± standard error).

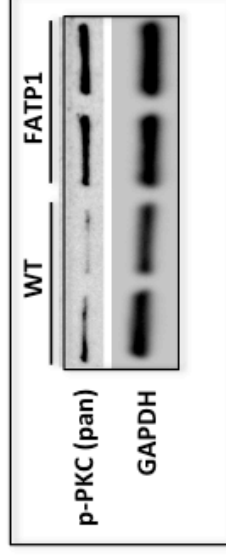

### Pan PKC Phosphorylation

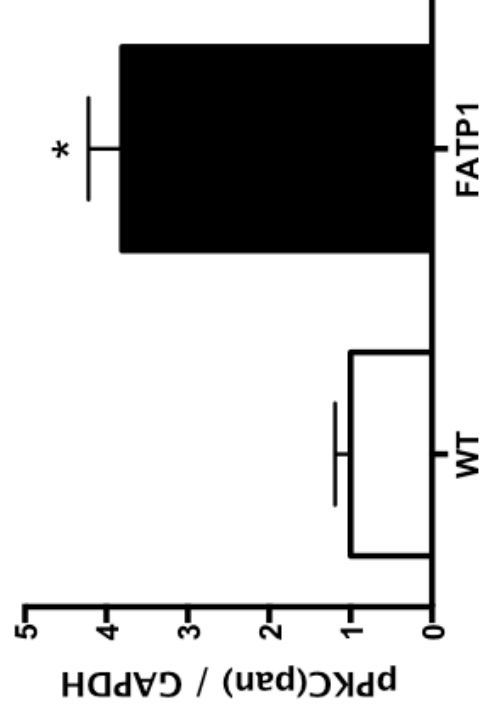

**Supplemental Figure 3:** FATP1 hearts have increased phosphorylation of the hydrophobic motif of PKC using a phospho-PKC pan (beta-II S660) antibody (n = 7-9, error bars are mean ± standard error).

| Gene Name | Gene Symbol  | Fold Change | Gene Name | Gene Symbol  | Fold Change |
|-----------|--------------|-------------|-----------|--------------|-------------|
| Acaa2     | NM_177470    | 0.22        | Mlycd     | NM_019966    | 0.52        |
| Acadl     | NM_007381    | 0.46        | Mmp9      | NM_013599    | 0.79        |
| Acadm     | NM_007382    | 0.52        | Ncoa3     | NM_008679    | 0.47        |
| Acox1     | NM_015729    | 0.53        | Ncoa6     | NM_019825    | 0.67        |
| Acox3     | NM_030721    | 0.72        | Nr1h3     | NM_013839    | 0.43        |
| Acsl1     | NM_007981    | 0.52        | Olr1      | NM_138648    | 1.30        |
| Acsl3     | NM_001033606 | 0.71        | Pck1      | NM_011044    | 0.41        |
| Acsl4     | NM_019477    | 0.98        | Pck2      | NM_028994    | 1.89        |
| Acsl5     | NM_027976    | 1.03        | Pdpk1     | NM_011062    | 0.90        |
| Adipoq    | NM_009605    | 0.54        | Pltp      | NM_011125    | 0.66        |
| Angptl4   | NM_020581    | 0.98        | Ppara     | NM_011144    | 0.40        |
| Apoa1     | NM_009692    | 0.23        | Ppard     | NM_011145    | 0.65        |
| Apoe      | NM_009696    | 1.14        | Pparg     | NM_011146    | 0.53        |
| BC006779  | NM_183162    | 0.42        | Ppargc1a  | NM_008904    | 0.78        |
| Cd36      | NM_007643    | 0.67        | Ppargc1b  | NM_133249    | 0.77        |
| Chd9      | NM_177224    | 0.76        | Pprc1     | NM_001081214 | 0.58        |
| Clu       | NM_013492    | 0.52        | Pten      | NM_008960    | 0.73        |
| Cpt1a     | NM_013495    | 1.04        | Rxra      | NM_011305    | 0.70        |
| Cpt1b     | NM_009948    | 0.57        | Rxrb      | NM_011306    | 0.94        |
| Cpt2      | NM_009949    | 0.38        | Rxrg      | NM_009107    | 0.55        |
| Creb1     | NM_133828    | 0.76        | Scd1      | NM_009127    | 0.93        |
| Crebbp    | NM_001025432 | 0.65        | Sirt1     | NM_019812    | 0.61        |
| Cyp27a1   | NM_024264    | 1.10        | Slc22a5   | NM_011396    | 0.61        |
| Cyp4a10   | NM_010011    | 0.41        | Slc27a1   | NM_011977    | 34.17       |
| Dgat1     | NM_010046    | 0.48        | Slc27a4   | NM_011989    | 0.80        |
| Ehhadh    | NM_023737    | 0.36        | Slc27a5   | NM_009512    | 0.28        |
| Eln       | NM_007925    | 0.78        | Slc27a6   | NM_001081072 | 2.22        |
| Ep300     | NM_177821    | 0.68        | Smarcd3   | NM_025891    | 0.71        |
| Etfdh     | NM_025794    | 0.51        | Sorbs1    | NM_009166    | 0.58        |
| Fabp1     | NM_017399    | 0.43        | Src       | NM_009271    | 1.07        |
| Fabp3     | NM_010174    | 0.53        | Tgs1      | NM_054089    | 0.81        |
| Fabp4     | NM_024406    | 0.63        | Txnip     | NM_023719    | 0.98        |
| Fabp5     | NM_010634    | 1.02        | Ucp1      | NM_009463    | 0.85        |
| Fabp7     | NM_021272    | 0.74        | Actb      | NM_007393    | 1.23        |
| Fads2     | NM_019699    | 0.58        | B2m       | NM_009735    | 1.00        |
| Fgr       | NM_010208    | 2.38        | Gapdh     | NM_008084    | 1.03        |
| Gyk       | NM_008194    | 1.20        | Gusb      | NM_010368    | 0.88        |
| Hif1a     | NM_010431    | 1.73        | Hsp90ab1  | NM_008302    | 0.90        |
| Hmgcs2    | NM_008256    | 0.42        |           |              |             |
| Hspd1     | NM_010477    | 1.00        |           |              |             |
| Ilk       | NM_010562    | 0.82        |           |              |             |
| Klf10     | NM_013692    | 0.86        |           |              |             |
| Lpl       | NM_008509    | 0.40        |           |              |             |
| Med1      | NM_013634    | 0.77        |           |              |             |

**Supplemental Table:** Transcript fold change of PPAR target genes by PCR array. n=2.
